# Supplementary material
Source: publisher figshare collection journal article supplement (https://tandf.figshare.com/ndownloader/files/20944539)
Supplement: Supplementary file 1 [file 20944539]

## **Supplementary Materials for “Corporate social responsibility in a competitive business environment”**

Carol Newman (Trinity College Dublin, Ireland)

John Rand (University of Copenhagen, Denmark)

Finn Tarp (University of Copenhagen, Denmark)

Neda Trifkovic (University of Copenhagen, Denmark)

Appendix Table A: CSR summary statistics, by survey year

|                                                            | (1)    | (2)       | (3)              | (4)   | (5)   | (6)   | (7)   |
|------------------------------------------------------------|--------|-----------|------------------|-------|-------|-------|-------|
|                                                            | All    | Compliers | Non<br>Compliers | 2011  | 2012  | 2013  | 2014  |
| <b>CSR index (0-12), mean</b>                              | 2.111  | 2.447     | 1.750            | 2.029 | 2.107 | 2.167 | 2.142 |
| <b>CSR index A - Management (0-4), mean</b>                | 1.314  | 1.557     | 1.051            | 1.248 | 1.259 | 1.387 | 1.360 |
| <b>CSR index B - Community (0-8), mean</b>                 | 0.798  | 0.890     | 0.699            | 0.782 | 0.848 | 0.780 | 0.781 |
| <b>A: Management</b>                                       |        |           |                  |       |       |       |       |
| CSR 1: Has a committee/board overseeing CSR practices?     | 0.431  | 0.543     | 0.311            | 0.375 | 0.383 | 0.493 | 0.474 |
| CSR 2: Has a written down CSR policy?                      | 0.747  | 0.818     | 0.670            | 0.734 | 0.738 | 0.758 | 0.756 |
| CSR 3: Member of CSR standards groups?                     | 0.029  | 0.045     | 0.011            | 0.028 | 0.026 | 0.037 | 0.025 |
| CSR 4: Has been awarded CSR type certifications or awards? | 0.107  | 0.151     | 0.059            | 0.111 | 0.112 | 0.099 | 0.105 |
| <b>B: Community</b>                                        |        |           |                  |       |       |       |       |
| CSR 5: Environmental Protection                            | 0.257  | 0.265     | 0.248            | 0.260 | 0.272 | 0.247 | 0.247 |
| CSR 6: Education                                           | 0.087  | 0.106     | 0.066            | 0.079 | 0.093 | 0.087 | 0.088 |
| CSR 7: Infrastructure Development                          | 0.079  | 0.080     | 0.079            | 0.082 | 0.082 | 0.075 | 0.078 |
| CSR 8: Health Care services                                | 0.051  | 0.067     | 0.033            | 0.047 | 0.054 | 0.052 | 0.049 |
| CSR 9: Youth Development                                   | 0.033  | 0.043     | 0.022            | 0.031 | 0.033 | 0.034 | 0.034 |
| CSR 10: Poverty Alleviation                                | 0.206  | 0.224     | 0.186            | 0.200 | 0.223 | 0.201 | 0.200 |
| CSR 11: Local Heritage                                     | 0.032  | 0.031     | 0.033            | 0.030 | 0.036 | 0.030 | 0.033 |
| CSR 12: Sporting events                                    | 0.053  | 0.073     | 0.032            | 0.052 | 0.055 | 0.054 | 0.052 |
| Number of observations                                     | 20,740 | 10,756    | 9,984            | 5,185 | 5,185 | 5,185 | 5,185 |

Source: Authors' calculations based on CIEM et al. (2015).

Appendix Table B: Heterogeneity – Static GMM estimates

|                                  | 1                                   | 2                                   | 3                                 | 4                                 |
|----------------------------------|-------------------------------------|-------------------------------------|-----------------------------------|-----------------------------------|
|                                  | ALL                                 | ALL                                 | Domestic                          | State/Foreign                     |
|                                  | Static                              | Static                              | Static                            | Static                            |
|                                  | Sys-GMM                             | Sys-GMM                             | Sys-GMM                           | Sys-GMM                           |
| <b>Focus variables</b>           |                                     |                                     |                                   |                                   |
| CSR index A - Management         | -0.0014<br>(0.0031)                 | -0.0030<br>(0.0031)                 | -0.0014<br>(0.0034)               | -0.0024<br>(0.0062)               |
| CSR index B - Community          | <b>0.0055***</b><br><b>(0.0020)</b> | <b>0.0054***</b><br><b>(0.0020)</b> | <b>0.0035*</b><br><b>(0.0021)</b> | <b>0.0081*</b><br><b>(0.0047)</b> |
| Hirschman/Herfindahl Index (HHI) | <b>-0.0980***</b><br>(0.0376)       | <b>-0.0822**</b><br>(0.0365)        | -0.0784<br>(0.0369)               | -0.0804<br>(0.0836)               |
| CSR(A)*HHI interaction           | 0.0300<br>(0.0243)                  | 0.0207<br>(0.0235)                  | 0.0290<br>(0.0248)                | 0.0095<br>(0.0507)                |
| CSR(B)*HHI interaction           | <b>0.0231**</b><br><b>(0.0113)</b>  | <b>0.0210*</b><br><b>(0.0113)</b>   | 0.0192<br>(0.0125)                | -0.0039<br>(0.0300)               |
| Efficiency controls              | Yes                                 | Yes                                 | Yes                               | Yes                               |
| Additional controls              | No                                  | Yes                                 | Yes                               | Yes                               |
| Obs.                             | 20,740                              | 20,740                              | 14,764                            | 5,584                             |
| Firms                            | 5,185                               | 5,185                               | 3,691                             | 1,396                             |
| No of Instruments                | 44                                  | 50                                  | 48                                | 50                                |
| AB test for AR(2) in first diff  | 0.559                               | 0.542                               | 0.764                             | 0.453                             |
| Hansen OID test (p-value)        | 0.166                               | 0.240                               | 0.591                             | 0.167                             |
| Levels exclusion (p-value)       | 0.045                               | 0.076                               | 0.576                             | 0.033                             |
| Levels exogenous (p-value)       | 0.799                               | 0.814                               | 0.497                             | 0.889                             |
| CSR exclusion (p-value)          | 0.546                               | 0.670                               | 0.495                             | 0.841                             |
| CSR exogenous (p-value)          | 0.082                               | 0.098                               | 0.578                             | 0.030                             |
| Interaction exclusion (p-value)  | 0.309                               | 0.286                               | 0.704                             | 0.039                             |
| Interaction exogenous (p-value)  | 0.170                               | 0.289                               | 0.416                             | 0.662                             |
| IV exclusion (p-value)           | 0.103                               | 0.059                               | 0.325                             | 0.118                             |
| IV exogenous (p-value)           | 0.760                               | 0.944                               | 0.923                             | 0.477                             |

Source: Authors' calculations based on CIEM et al. (2015).

Note: Note: Dependent variable: Real revenue per employee (log). Static system GMM estimators. Twostep with Windmeijer's finite-sample correction for the two-step covariance matrix. Standard errors (reported in parenthesis). \*, \*\*, \*\*\* indicate significance at a 10 percent, 5 percent and 1 percent level, respectively.

Appendix Table C: Wage share heterogeneity – OLS and Static GMM estimates

|                                  | 1                            | 2                             | 3                            | 4                             |
|----------------------------------|------------------------------|-------------------------------|------------------------------|-------------------------------|
|                                  | OLS                          | OLS                           | Static<br>Sys-GMM            | Static<br>Sys-GMM             |
| <b>Focus variables</b>           |                              |                               |                              |                               |
| CSR index A - Management         | <b>-0.0070**</b><br>(0.0029) | 0.0004<br>(0.0025)            | -0.0017<br>(0.0048)          | -0.0028<br>(0.0044)           |
| CSR index B - Community          | <b>-0.0034*</b><br>(0.0018)  | <b>-0.0050***</b><br>(0.0016) | <b>-0.0049**</b><br>(0.0025) | <b>-0.0058**</b><br>(0.0024)  |
| Hirschman/Herfindahl Index (HHI) | <b>-0.0357**</b><br>(0.0148) | <b>-0.0813***</b><br>(0.0130) | <b>-0.0282*</b><br>(0.0148)  | <b>-0.0727***</b><br>(0.0133) |
| Efficiency controls              | No                           | Yes                           | No                           | Yes                           |
| Additional controls              | Yes                          | Yes                           | Yes                          | Yes                           |
| Obs.                             | 18,466                       | 18,466                        | 18,466                       | 18,466                        |
| Firms                            | 4,983                        | 4,983                         | 4,983                        | 4,983                         |
| R-squared                        | 0.081                        | 0.247                         | ..                           | ..                            |
| No of Instruments                | ..                           | ..                            | 30                           | 33                            |
| AB test for AR(2) in first diff  | ..                           | ..                            | 0.161                        | 0.144                         |
| Hansen OID test (p-value)        | ..                           | ..                            | 0.854                        | 0.669                         |
| Levels exclusion (p-value)       | ..                           | ..                            | 0.674                        | 0.540                         |
| Levels exogenous (p-value)       | ..                           | ..                            | 0.846                        | 0.660                         |
| CSR exclusion (p-value)          | ..                           | ..                            | 0.895                        | 0.689                         |
| CSR exogenous (p-value)          | ..                           | ..                            | 0.571                        | 0.533                         |
| IV exclusion (p-value)           | ..                           | ..                            | 0.833                        | 0.752                         |
| IV exogenous (p-value)           | ..                           | ..                            | 0.557                        | 0.287                         |

Source: Authors' calculations based on CIEM et al. (2015).

Note: Note: Dependent variable: Real revenue per employee (log). OLS and Static system GMM estimators. Twostep with Windmeijer's finite-sample correction for the two-step covariance matrix. Standard errors (reported in parenthesis). \*, \*\*, \*\*\* indicate significance at a 10 percent, 5 percent and 1 percent level, respectively.

Appendix Figure 1: CSR interlinkages

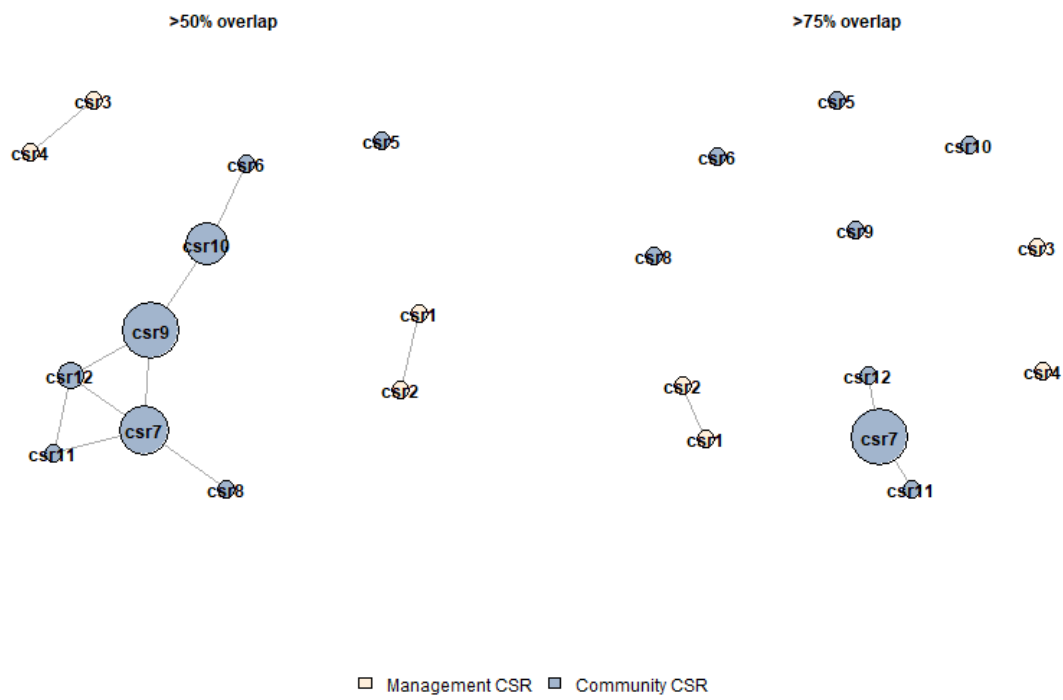

Source: Authors' calculations based on CIEM et al. (2015).

Appendix Figure 2: Labour compensation, CSR, and competition

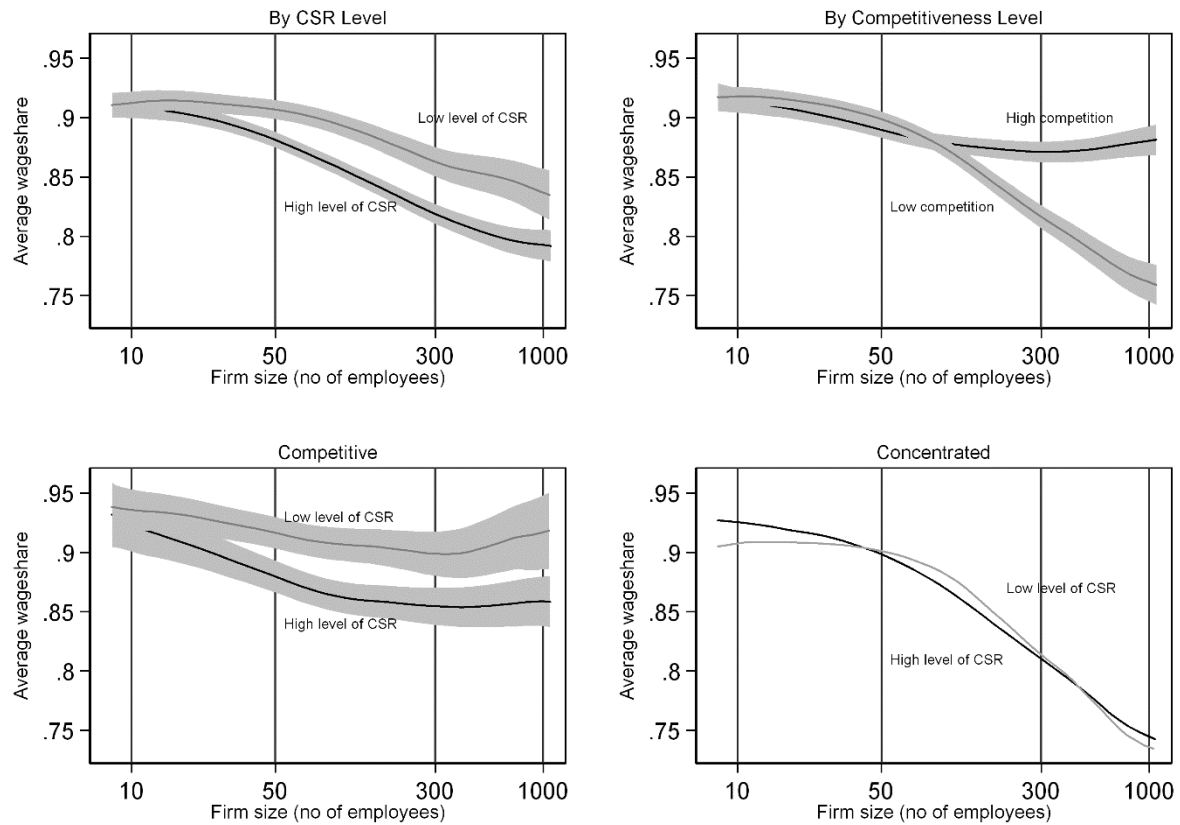

Source: Authors' calculations based on CIEM et al. (2015).

*Note:* Kernel weighed local mean smoothing using the Epanechnikov kernel and a bandwidth of 0.8 Appendix Figure 2 shows the association between firm size and the average wage share (share of value added being paid out as labour compensation), split by CSR (panel A) and industry competition (panel B). The black curve is the average wage share in firms with an important level of CSR (panel A) or operating in a competitive industry (panel B) while the grey curve is the average wage share in firms with a low level of CSR and competition pressure, respectively. The shaded areas show the point-wise 90 per cent confidence intervals. The four vertical lines in the plots indicate the upper limits on the size of enterprises using the standard World Bank definition: micro (up to 10 employees), small (up to 50 employees), and medium (up to 300 employees). Starting with Panel A, we see a significant difference in wage shares being paid by firms with high and low levels of CSR. Throughout the size distribution, we find that firms more actively engaging in CSR activities tend to compensate their employees at a lower rate of total generated value added than their counterparts, which are less involved in CSR activities. Panel B of Figure 2 shows the average wage share differences between firms operating in highly competitive industries ( $HHI < 20$  per cent), compared with firms in concentrated sectors ( $HHI > 80$  per cent). Workers in highly competitive sectors are compensated at a relatively constant rate of value added (around 90 per cent); whereas there is a sharp decline in wage compensation shares along the firm size distribution in concentrated sectors. Panels C and D of Appendix Figure 2 show wage differences between high and low CSR firms along the industry competitiveness dimension. In competitive industries, the share of value added accruing to workers in 'low' CSR firms is at a relatively constant level, which along the firm size distribution is higher than in 'high' CSR firms. In concentrated sectors, average labour compensation shares of value added are log-linearly declining in firm size in companies with strong CSR profiles. Throughout the firm size distribution, firms less engaged in CSR activities allocate larger shares of value added to their workers, and it is noticeable in both panel C and D that the differences in labour compensation rates between high and low CSR firms are more pronounced in the medium firm size segment.
